# Supplementary material for: Draft Genome Sequence of the Commercial Strain <em>Rhizobium leguminosarum </em>bv. <em>viciae </em>RCAM1022
Source: Preprints.org preprint supplement (doi:10.20944/preprints202311.1377.v1), 2023-11-22
Supplement: Supplementary file 1 [file supplementary]

## Sheet: rcam1022_vs_rcam1026_difference
GENE ID RCAM1022	FUNCTION
LKFKEJNA_00042	30S ribosomal protein S17
LKFKEJNA_00053	Elongation factor Tu
LKFKEJNA_00056	30S ribosomal protein S12
LKFKEJNA_00147	Lon protease
LKFKEJNA_00206	3-oxoacyl-[acyl-carrier-protein] synthase 3
LKFKEJNA_00924	hypothetical protein
LKFKEJNA_01498	Catabolite control protein A
LKFKEJNA_01556	ISNCY family transposase ISRel26
LKFKEJNA_01687	L-idonate 5-dehydrogenase (NAD(P)(+))
LKFKEJNA_02035	hypothetical protein
LKFKEJNA_02516	Glutathione import ATP-binding protein GsiA
LKFKEJNA_03006	Peptidoglycan-associated lipoprotein
LKFKEJNA_03074	L,D-transpeptidase
LKFKEJNA_03311	Precorrin-6A reductase
LKFKEJNA_03312	Precorrin-3B C(17)-methyltransferase
LKFKEJNA_03686	Sensor histidine kinase RcsC
LKFKEJNA_03861	Periplasmic oligopeptide-binding protein | OppA
LKFKEJNA_04114	hypothetical protein
LKFKEJNA_04318	HTH-type transcriptional regulator DmlR
LKFKEJNA_04482	Leu/Ile/Val-binding protein
LKFKEJNA_04648	Protein-export protein SecB
LKFKEJNA_04917	Histidinol-phosphate aminotransferase
LKFKEJNA_05776	MAPEG family protein
LKFKEJNA_06214	Acylamidase
LKFKEJNA_06392	Glutathione amide reductase
LKFKEJNA_06456	Nodulation protein O
LKFKEJNA_06631	RNA polymerase subunit sigma-70
LKFKEJNA_06944	IS110 family transposase ISMno29
LKFKEJNA_06945	IS110 family transposase ISMno29
The genes in which substitutions lead to a change in the amino acid sequence are highlighted in red italics
